# Supplementary material for: A stabilized glycomimetic conjugate vaccine inducing protective antibodies against Neisseria meningitidis serogroup A
Source: PubMed Central journal article supplement (PMC7477203; doi:10.1038/s41467-020-18279-x), 2020-09-07
Supplement: 41467_2020_18279_MOESM2_ESM.pdf [file 41467_2020_18279_MOESM2_ESM.pdf]

Editorial Notes: This manuscript has been previously reviewed at another journal that is not operating a transparent peer review scheme. The manuscript was considered suitable for publication without further review at *Nature Communications*.
